# Supplementary material
Source: PubMed Central journal article supplement (PMC6557147)
Supplement: jmm-68-255-s001.pdf [file jmm-68-255-s001.pdf]

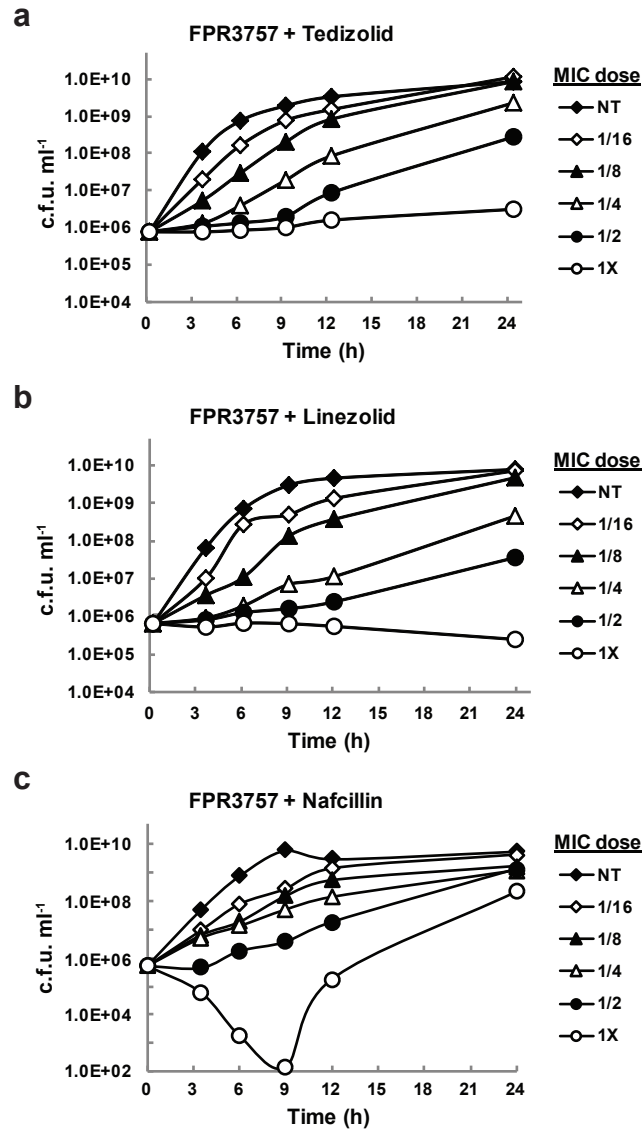

FIGURE S1

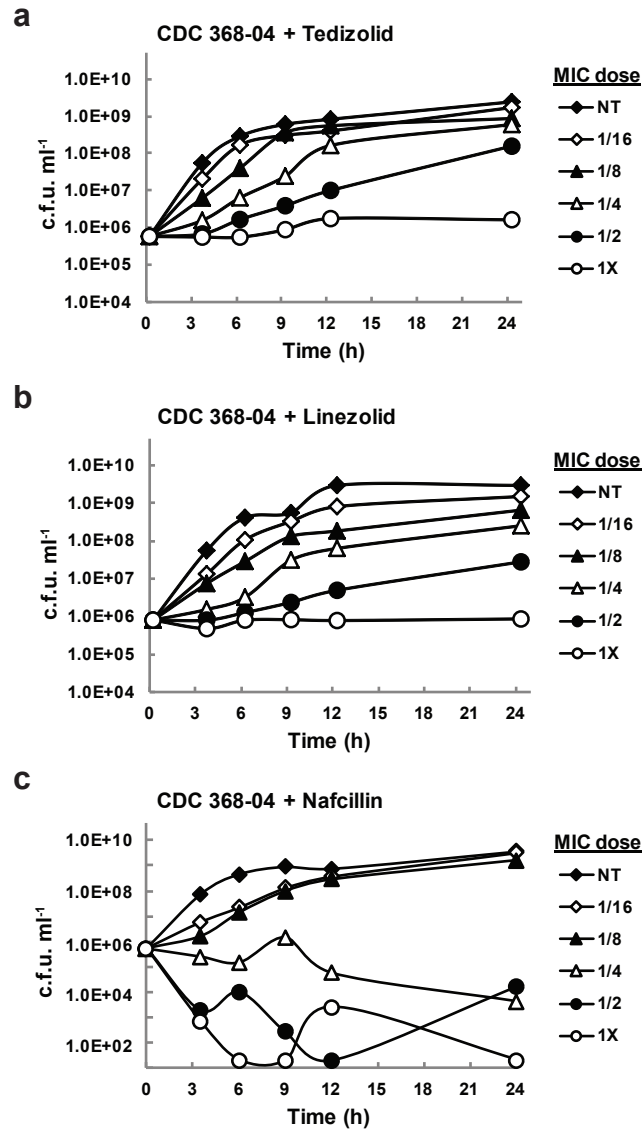

FIGURE S2

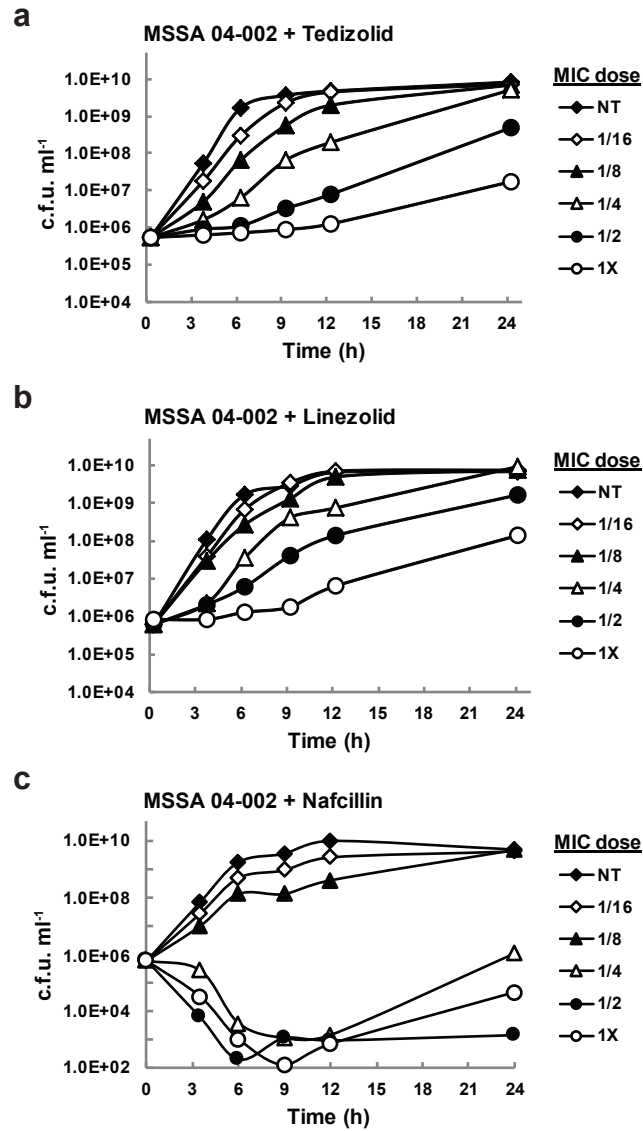

FIGURE S3

**Figures S1-S3. Effect of sub-MIC antibiotics on *S. aureus* growth.** The growth of *S. aureus* FPR3757 (Fig. S1), CDC 368-04 (Fig. S2), and MSSA 04-002 (Fig. S3) was monitored over time in the presence of varying concentrations of antibiotic. Bacteria were grown in Mueller-Hinton II broth containing (a) tedizolid, (b) linezolid or (c) nafcillin at 1/16X, 1/8X, 1/4X, 1/2X or 1X the MIC. Culture samples were collected at 0, 3, 6, 9, 12 and 24 h for bacterial quantitation. NT, no treatment control.

**Table S1. MRSA 1560 bacterial levels following culture with the indicated antibiotic treatment.**

|             | <b>MIC dose</b> | <b>Tedizolid</b>       | <b>Linezolid</b>       | <b>Nafcillin</b>        |
|-------------|-----------------|------------------------|------------------------|-------------------------|
| <b>12 h</b> | NT              | 5.35 x 10 <sup>9</sup> | 4.25 x 10 <sup>9</sup> | 4.33 x 10 <sup>9</sup>  |
|             | 1/16X           | 3.80 x 10 <sup>9</sup> | 1.75 x 10 <sup>9</sup> | 1.03 x 10 <sup>9</sup>  |
|             | 1/8X            | 1.10 x 10 <sup>9</sup> | 4.76 x 10 <sup>8</sup> | 4.18 x 10 <sup>8</sup>  |
|             | 1/4X            | 2.05 x 10 <sup>8</sup> | 5.35 x 10 <sup>7</sup> | 8.85 x 10 <sup>6</sup>  |
|             | 1/2X            | 3.23 x 10 <sup>6</sup> | 1.59 x 10 <sup>6</sup> | 2.47 x 10 <sup>4</sup>  |
|             | 1X              | 1.94 x 10 <sup>6</sup> | 5.33 x 10 <sup>5</sup> | 2.73 x 10 <sup>4</sup>  |
|             | <b>24 h</b>     | NT                     | 6.24 x 10 <sup>9</sup> | 1.20 x 10 <sup>10</sup> |
| 1/16X       |                 | 5.92 x 10 <sup>9</sup> | 6.00 x 10 <sup>9</sup> | 1.36 x 10 <sup>10</sup> |
| 1/8X        |                 | 7.26 x 10 <sup>9</sup> | 3.81 x 10 <sup>9</sup> | 4.26 x 10 <sup>9</sup>  |
| 1/4X        |                 | 3.58 x 10 <sup>9</sup> | 4.57 x 10 <sup>8</sup> | 3.25 x 10 <sup>8</sup>  |
| 1/2X        |                 | 1.92 x 10 <sup>8</sup> | 1.89 x 10 <sup>7</sup> | 6.75 x 10 <sup>5</sup>  |
| 1X          |                 | 7.50 x 10 <sup>6</sup> | 1.64 x 10 <sup>5</sup> | 4.58 x 10 <sup>5</sup>  |

**TABLE S1**
